# Supplementary material for: Evaluation of the learning curve for totally robotic single-anastomosis duodenal–ileal bypass with sleeve gastrectomy by CUSUM analysis
Source: Research Square preprint supplement (doi:10.21203/rs.3.rs-681528/v1), 2021-07-09
Supplement: Supplementary file 1 [file 0353b4ccdb83ca0ad1eab73d.doc]

**Table 1** Patient demographics

| Factor | All patients (n =71) |
| --- | --- |
| Gender: Male/Female | 29/42 |
| Mean age (years) | 33.65±8.67 |
| Preoperative body weight (kg) | 123.20±26.89 |
| Preoperative BMI (kg/m2) | 42.16±7.15 |
| Preoperative waistline (cm) | 127.25±16.32 |
| Previous upper abdominal surgery | 0 |
| ASA Classification  Grade II  Grade III | 45 (66.1%)  26 (33.9%) |

ASA Classification: American Society of Anesthesiology Physical Status classification.

**Table 2** Comparison of the demographics between the 2 study groups

|  | Learning stage group  (n=27) | Mastery stage group  (n=44) | Statistic | *P* value |
| --- | --- | --- | --- | --- |
| Gender (Male/Female) | 10/17 | 19/25 | χ2=0.261 | 0.609 |
| Age (years) | 33.41±9.21 | 33.78±8.43 | U=594.000 | 1.000 |
| Preoperative body weight (kg) | 121.37±28.27 | 124.32±26.28 | t=-0.446 | 0.657 |
| Preoperative BMI (kg/m2) | 41.92±6.93 | 42.30±7.35 | t=-0.220 | 0.826 |
| Preoperative waistline (cm) | 126.56±13.94 | 127.68±17.76 | t=-0.281 | 0.780 |
| Standard live volume (cm3) | 1605.01±214.97 | 1635.71±189.53 | t=-0.629 | 0.531 |
| ASA Classification  (grade II/grade III) | 17/10 | 28/16 | χ2=0.003 | 0.954 |

ASA Classification: American Society of Anesthesiology Physical Status classification. BMI: Body mass index

**Table 3** Comparison of the operation-related outcomes between the 2 study groups

|  | Learning stage group  (n=27) | Mastery stage group  (n=44) | Statistic | *P* value |
| --- | --- | --- | --- | --- |
| Operative time（min） | 202.22±36.86 | 171.52±30.13 | U=297.500 | ***0.000*** |
| Number of staplers in SG | 6.04±1.06 | 5.89±0.84 | U=575.500 | 0.811 |
| First assistant level | 7.93±5.87 | 25.18±14.27 | U=178.500 | ***0.000*** |
| Level of scrubbed nurse | 2.33±1.75 | 4.95±3.77 | U=301.500 | ***0.000*** |
| Complications overall | 3（9.7%） | 4 (9.1%) | χ2=0.000 | 1.000 |
| Conversion to laparotomy | 0 | 0 | - | - |
| Reoperations | 1 (3.7%) | 1 (2.3%) | 0.000 | 1.000 |
| Readmission | 1 (3.2%) | 0 | - | 0.380 |
| Mortality | 0 | 0 | - | - |
| Abdominal drainage tube | 20 (74.1%) | 8 (18.2%) | χ2=21.885 | ***0.000*** |
| Postoperative hospital stay（days） | 6.70±2.05 | 7.82±8.05 | U=505.500 | 0.270 |

SG: Sleeve gastrectomy

**Table 4** Multivariate analysis for the operation time

| **Risk Factor** | ***β*** | 95 % lower | 95 % upper | *P* value |
| --- | --- | --- | --- | --- |
| Sex | 0.266 | -1.019 | 39.523 | 0.062 |
| Age | 0.011 | -1.049 | 1.139 | 0.934 |
| Body weight | 1.028 | -3.130 | 5.873 | 0.544 |
| Waistline | -0.138 | -1.244 | 0.638 | 0.521 |
| BMI | -0.033 | -6.525 | 6.193 | 0.959 |
| ASA Classification | 0.036 | -15.048 | 20.427 | 0.763 |
| Numbers of staplers in SG | 0.160 | -2.074 | 14.517 | 0.139 |
| First assistant level | 0.025 | -0.555 | 0.654 | 0.870 |
| Level of scrubbed nurse | -0.231 | -4.999 | 0.102 | .060 |
| Standard live volume | -0.684 | -0.563 | 0.316 | 0.576 |
| Case number | -2.878 | -8.320 | -1.688 | ***0.004*** |
| Successful case number | 2.605 | 2.009 | 11.599 | ***0.006*** |

ASA Classification: American Society of Anesthesiology Physical Status classification. BMI: Body mass index.

SG: Sleeve gastrectomy. The definition of successful case in totally robotic SADI-S included freedom from the following factors: operative time >210 min, the length of postoperative stay >7 days, postoperative morbid event ≥ Clavien grade II, conversion to laparotomy, and rehospitalization or death after totally robotic SADI-S.

**Table 5** Comparison of the demographics between the successful group and the unsuccessful group

|  | Unsuccessful group (n=25) | Successful group (n=46) | Statistic | *P* value |
| --- | --- | --- | --- | --- |
| Gender (Male/Female) | 11/14 | 18/28 | χ2=0.159 | 0.690 |
| Age (years) | 33.16±8.59 | 33.91±8.80 | U=563.500 | 0.890 |
| Preoperative body weight (kg) | 125.84±27.16 | 121.76±26.73 | t=0.608 | 0.545 |
| Preoperative BMI (kg/m2) | 43.12±6.74 | 41.64±7.38 | t=0.703 | 0.408 |
| Preoperative waistline (cm) | 129.28±13.56 | 126.15±17.68 | t=0.832 | 0.409 |
| Standard live volume (cm3) | 163898±198.46 | 1615.92±200.45 | t=0.465 | 0.644 |
| ASA Classification  (grade II/grade III) | 16/9 | 29/11 | χ2=0.006 | 0.936 |

ASA Classification: American Society of Anesthesiology Physical Status classification. BMI: Body mass index.

The definition of successful case in totally robotic SADI-S included freedom from the following factors: operative time >210 min, the length of postoperative stay >7 days, postoperative morbid event ≥Clavien grade II, conversion to laparotomy, and rehospitalization or death after totally robotic SADI-S.
